# Supplementary material for: A stable mixed lanthanide metal–organic framework for highly sensitive thermometry
Source: Royal Society of Chemistry journal article supplement (doi:10.1039/c9dt00217k), 2019-01-01
Supplement: c9dt00217k1.pdf [file c9dt00217k1.pdf]

## **A stable mixed lanthanide metal-organic framework for highly sensitive thermometry**

Yue Pan,<sup>a</sup> Hai-Quan Su,<sup>\*a</sup> En-Long Zhou,<sup>\*b</sup> Hong-Zong Yin<sup>\*b</sup> Kui-Zhan Shao,<sup>c</sup> Zhong-Min Su<sup>\*c</sup>

---

School of Chemistry and Chemical Engineering, Inner Mongolia University, 235 West Daxue Road, Hohhot 010021, China, E-mail: haiquansu@yahoo.com

College of Chemistry and Material Science, Shandong Agricultural University, Tai'an, 271018, P. R. China. E-mail: iamelzhou@njtech.edu.cn

Institute of Functional Material Chemistry, National & Local United Engineering Lab for Power Battery, Northeast Normal University, Changchun, 130024 Jilin, P. R. China. E-mail: zmsu@nenu.edu.cn

### Materials and Instrumentation:

All chemicals were obtained commercially and used without any additional purification. Single-crystal diffraction was conducted on a Bruker Smart Apex CCD II area-detector diffractometer with graphite-monochromated Mo  $K\alpha$  radiation ( $\lambda = 0.71073 \text{ \AA}$ ) at room temperature. Elemental analyses (C, H, and N) were performed on a Perkin-Elmer 2400 CHN elemental analyzer and the metal contents were determined with a PLASMA-SPEC(I) ICP atomic emission spectrometer. IR spectra were recorded in the range  $4000\text{-}400 \text{ cm}^{-1}$  on Mattson Alpha-Centauri spectrometer using KBr pellets. Thermal gravimetric (TG) analyses were performed on a Perkin-Elmer TGA7 instrument in flowing  $\text{N}_2$  with a heating rate of  $10 \text{ }^\circ\text{C}/\text{min}$ . Powder X-ray diffraction (XRD) measurements were performed on a Rigaku D/MAX-3 instrument with Cu  $K\alpha$  radiation in the angular range  $2\theta = 3^\circ\text{-}50^\circ$  at 293 K. Temperature-dependent X-ray diffraction experiments were performed on an Ultima-IV X-ray diffractometer with a step size of  $0.02^\circ$  in  $2\theta$ . Emission and excitation spectra in the solid state were investigated on the F-4500 FL spectrophotometer. The temperature dependence of luminescence (77-377 K range) was investigated by setting the sample in a cryostat (OptistatDN2, Oxford Instruments). Temperature-dependent decay curves were recorded on a Horiba Delta Flex equipped with different excitation sources.

### Synthesis of compound 1 to 3

A mixture of  $\text{Eu}(\text{NO}_3)_3 \cdot 6\text{H}_2\text{O}$  (46 mg, 0.1 mmol) and  $\text{H}_4\text{BPTC}$  (17 mg, 0.05 mmol) were mixed in solvent of N, N-dimethylformamide (DMF, 6 mL) and distilled water (2 mL). The mixtures were stirred for 15 minutes and were transferred to a Teflon-lined stainless steel vessel (15 mL) and heated to  $100 \text{ }^\circ\text{C}$ . After maintaining at this temperature for two days, the Teflon-lined stainless steel vessel cooled to room temperature naturally. The resulting colorless rodlike crystals of **1** were obtained and washed by distilled water and DMF, yielding 78% based on  $\text{Eu}^{3+}$ . Calcd (%) for  $\text{C}_{18}\text{H}_{14}\text{NO}_8\text{Eu}$  (524.27): C 41.24, H 2.69, N 2.67; found: C 41.19, H 2.74, N 2.58. Compound **2** was obtained in 87% yield in a way similar to that described for **1** by using  $\text{Tb}(\text{NO}_3)_3 \cdot 6\text{H}_2\text{O}$  instead of  $\text{Eu}(\text{NO}_3)_3 \cdot 6\text{H}_2\text{O}$ . Calcd (%) for  $\text{C}_{18}\text{H}_{14}\text{NO}_8\text{Tb}$  (531.23): C 40.70, H 2.66, N 2.64; found: C 40.78, H 2.54, N 2.57.

The same procedure was used for the synthesis of mixed compound **3** by using a mixture of  $\text{Eu}(\text{NO}_3)_3 \cdot 6\text{H}_2\text{O}$  and  $\text{Tb}(\text{NO}_3)_3 \cdot 6\text{H}_2\text{O}$  as metal sources.

### X-ray Crystallography:

Single-crystal diffraction was conducted on a Bruker Smart Apex CCD II area-detector diffractometer with graphite-monochromated Mo  $K\alpha$  radiation ( $\lambda = 0.71073 \text{ \AA}$ ) at room temperature. The linear absorption coefficients, scattering factors for the atoms, and anomalous dispersion corrections were taken from the International Tables for X-Ray Crystallography. Empirical absorption corrections were applied. The structures were solved by using the direct method and refined through the full-matrix least-squares method on F2 using SHELXS-97.

Crystal data of **1**: Trigonal, Fw = 478.17 g/mol, space group  $P3_1$ ,  $Z = 6$ ,  $a = 13.8165 (16) \text{ \AA}$ ,  $b = 13.8165 (16) \text{ \AA}$ ,  $c = 22.984 (3) \text{ \AA}$ ,  $\alpha = \beta = 90 \text{ deg}$ ,  $\gamma = 120 \text{ deg}$ ,  $V = 3799.7(12) \text{ \AA}^3$ ,  $T = 296 (2) \text{ K}$ , 23781 reflections measured, 5021 independent reflections ( $R_{\text{int}} =$

0.0389). The final  $R_1$  values were 0.0277 ( $I > 2\sigma(I)$ ). The final  $wR(F^2)$  values were 0.0598 ( $I > 2\sigma(I)$ ). The goodness of fit on  $F^2$  was 0.927.

Crystal data of **2**: Trigonal, Fw = 485.14 g/mol, space group  $P3_1$ ,  $Z = 6$ ,  $a = 13.825$  (5) Å,  $b = 13.825$  (5) Å,  $c = 22.984$  (5) Å,  $\alpha = \beta = 90$  deg,  $\gamma = 120$  deg,  $V = 3804$ (3) Å<sup>3</sup>,  $T = 296$  (2) K, 26250 reflections measured, 5626 independent reflections ( $R_{\text{int}} = 0.0451$ ). The final  $R_1$  values were 0.0293 ( $I > 2\sigma(I)$ ). The final  $wR(F^2)$  values were 0.0593 ( $I > 2\sigma(I)$ ). The goodness of fit on  $F^2$  was 0.946.

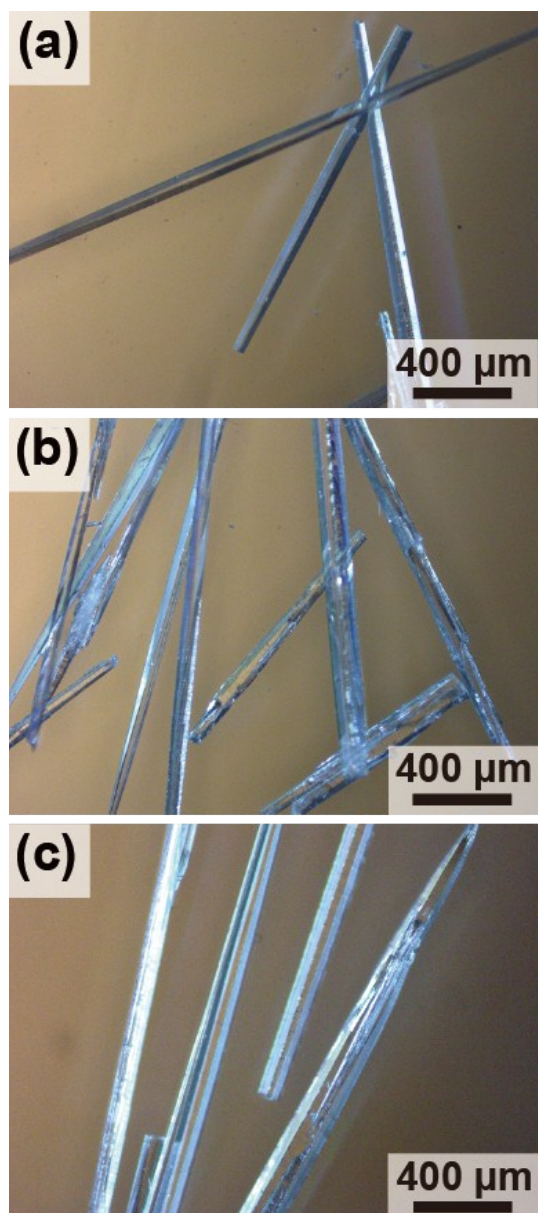

**Figure S1.** Optical micrographs of (a) compound 1, (b) compound 2 and (c) compound 3.

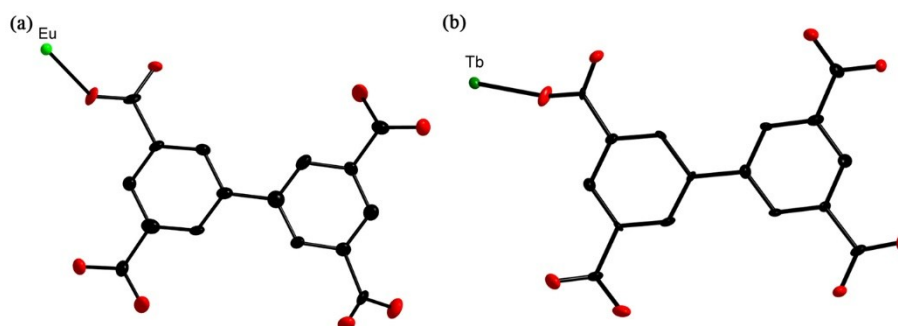

**Figure S2.** The ORTEP-style image of the asymmetric unit of (a) compound 1 and (b) compound 2.

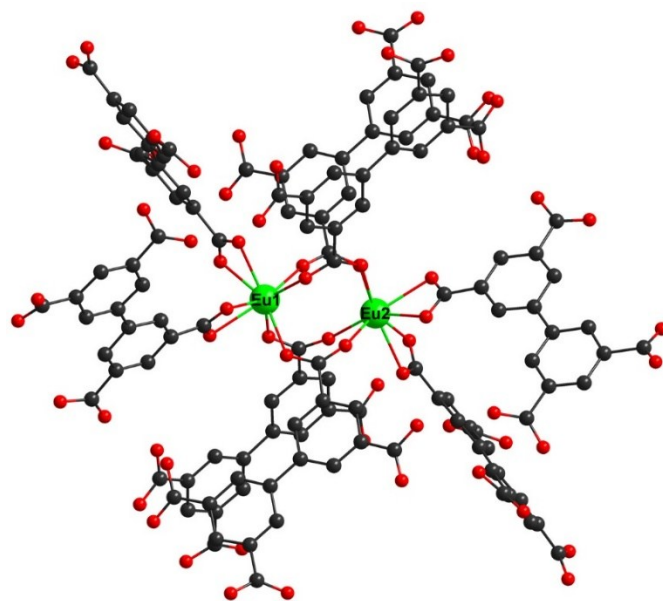

**Figure S3.** The coordination environment of Eu<sup>3+</sup> in compound **1**.

**Table S1.** Selected Eu-O bond lengths (Å) of compound **1**

| Compound <b>1</b> |       |         |       |
|-------------------|-------|---------|-------|
| Eu1-O1            | 2.309 | Eu2-O2  | 2.389 |
| Eu1-O5            | 2.389 | Eu2-O3  | 2.480 |
| Eu1-O7            | 2.439 | Eu2-O4  | 2.481 |
| Eu1-O8            | 2.521 | Eu2-O6  | 2.319 |
| Eu1-O10           | 2.392 | Eu2-O9  | 2.328 |
| Eu1-O11           | 2.462 | Eu2-O13 | 2.378 |
| Eu1-O12           | 2.484 | Eu2-O15 | 2.553 |
| Eu1-O14           | 2.331 | Eu2-O16 | 2.467 |

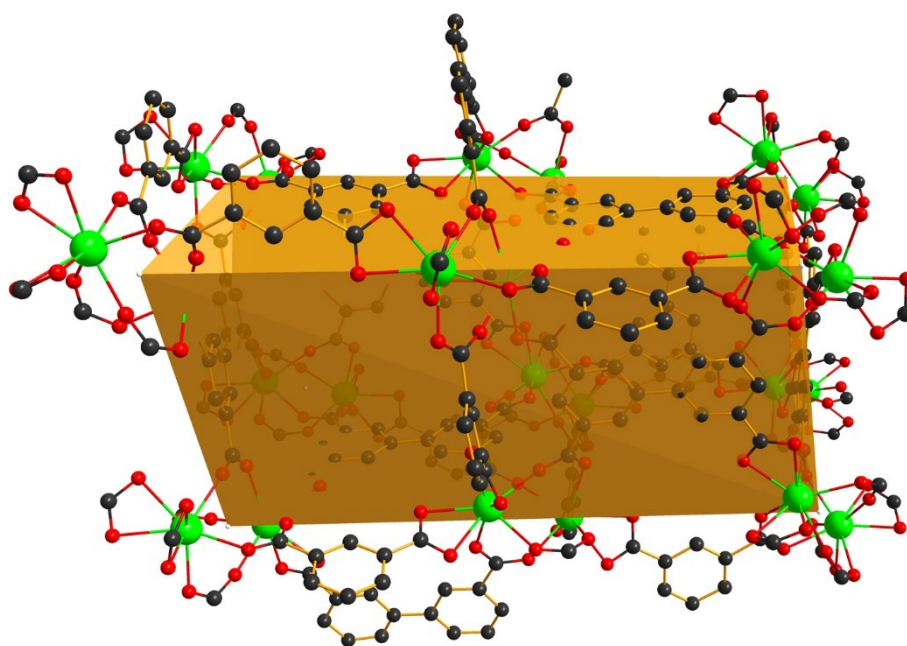

**Figure S4.** The parallelogram cage constructed by 24 nuclear Eu<sup>3+</sup> ions.

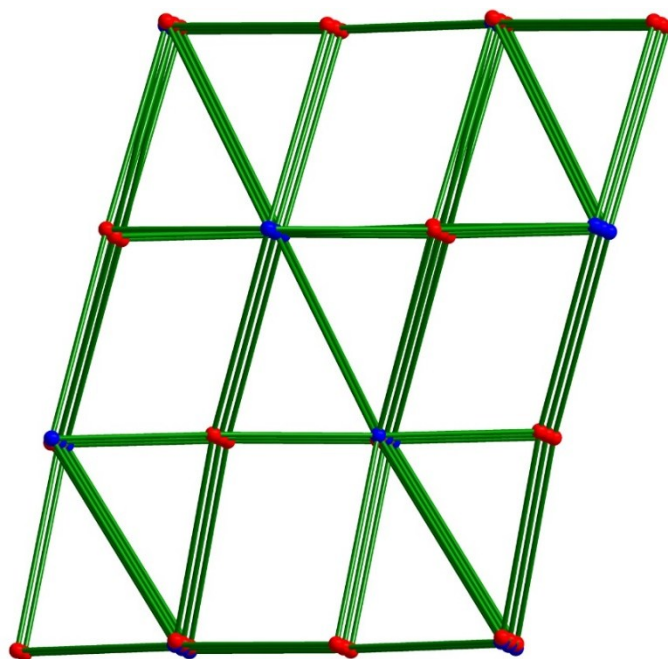

**Figure S5.** The topology of compound **1** viewed along *b* axis.

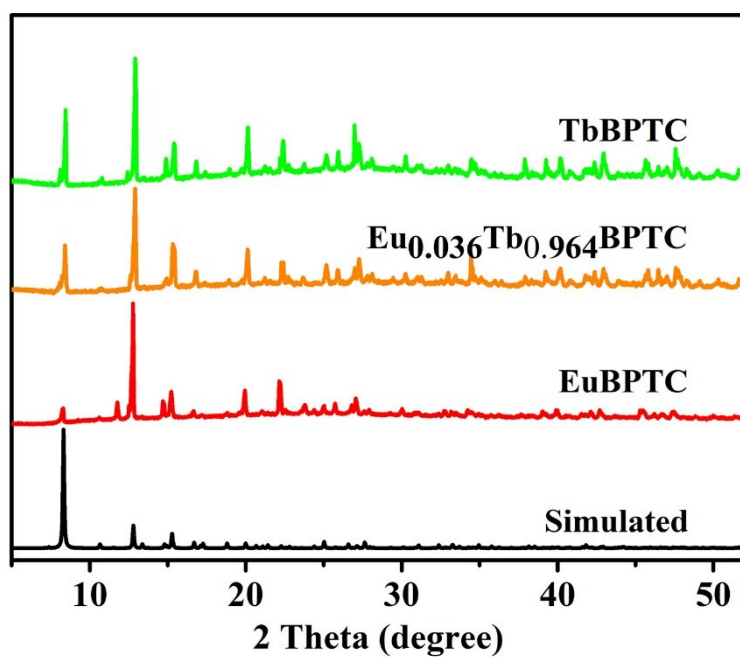

**Figure S6.** Comparison of powder X-ray diffraction patterns of EuBPTC, TbBPTC, and their mixed sample with that simulated from the X-ray single structure.

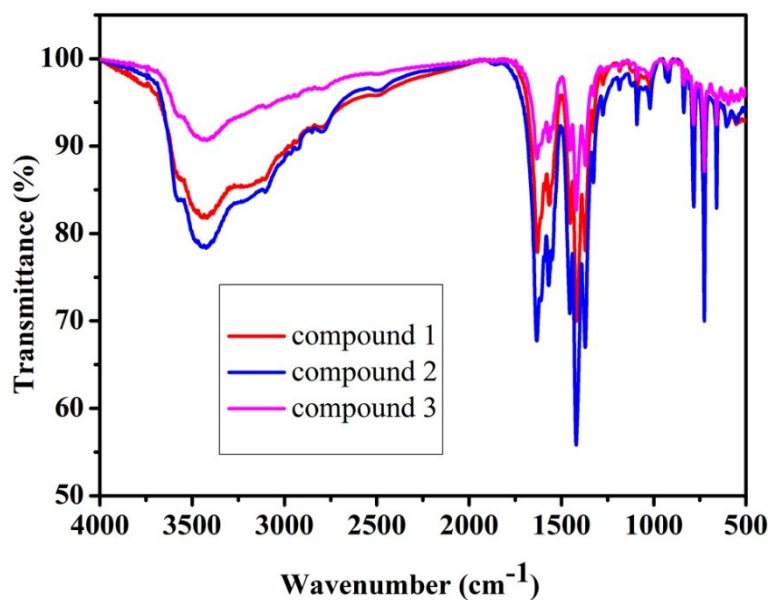

**Figure S7.** The IR spectroscopy of compound 1, compound 2 and compound 3.



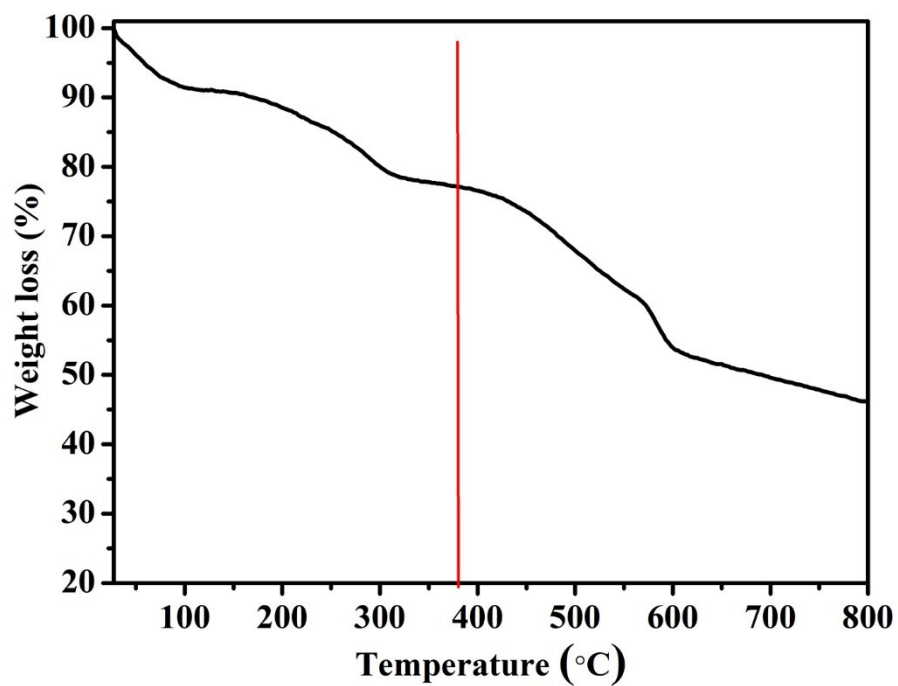

Figure S8. The TG curve of compound 1.

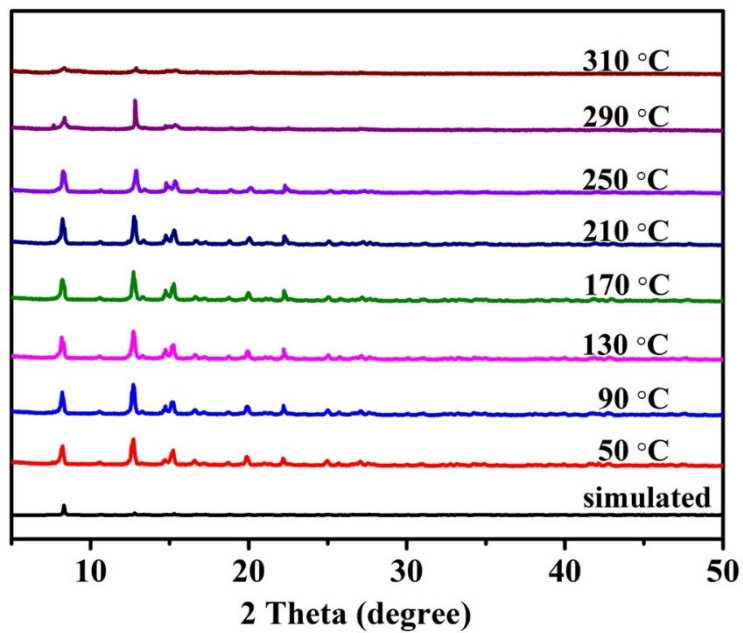

Figure S9. *In situ* variable-temperature powder X-ray diffraction of compound 1.

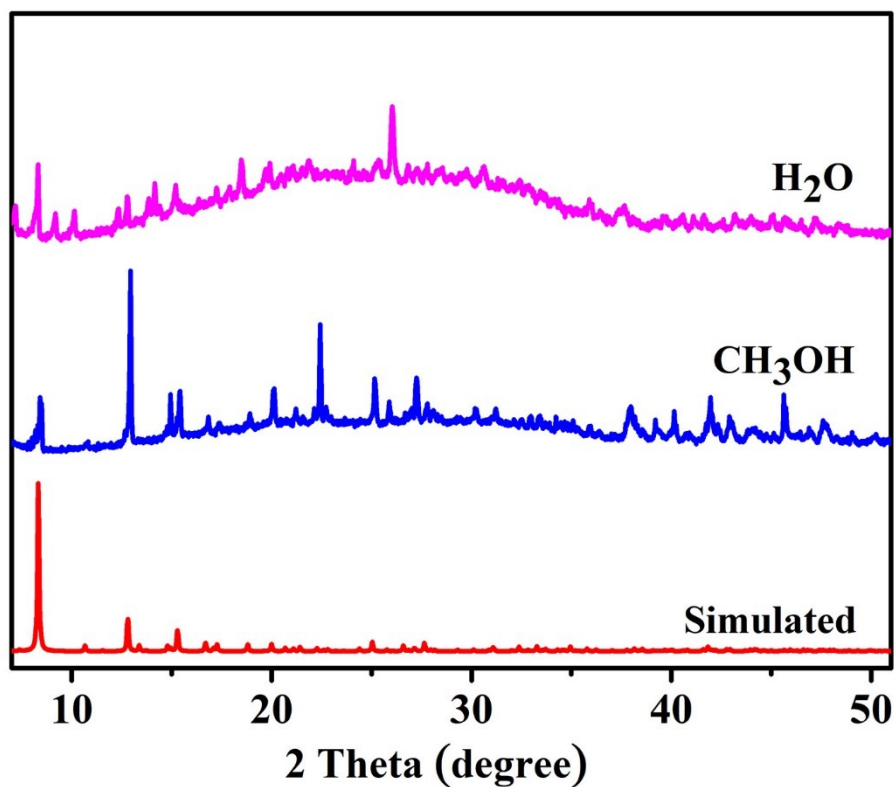

**Figure S10.** Powder X-ray diffraction of compound 1 after immersed in different solvents at 100 °C for 3 days.

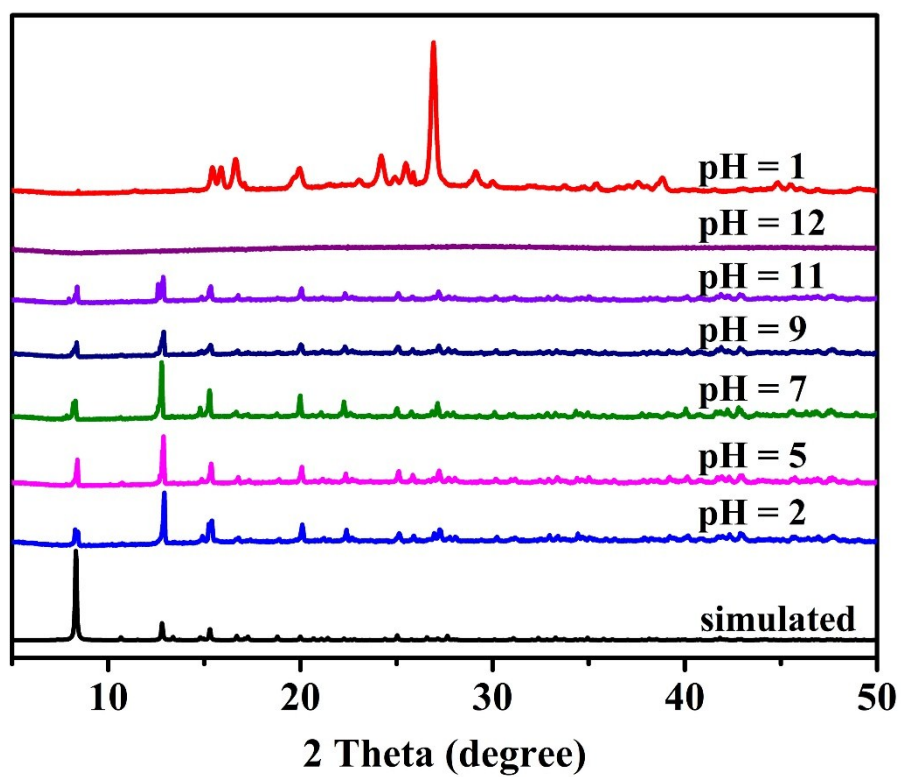

**Figure S11.** Powder X-ray diffraction of compound 1 after immersed in different pH solution for 24 h.

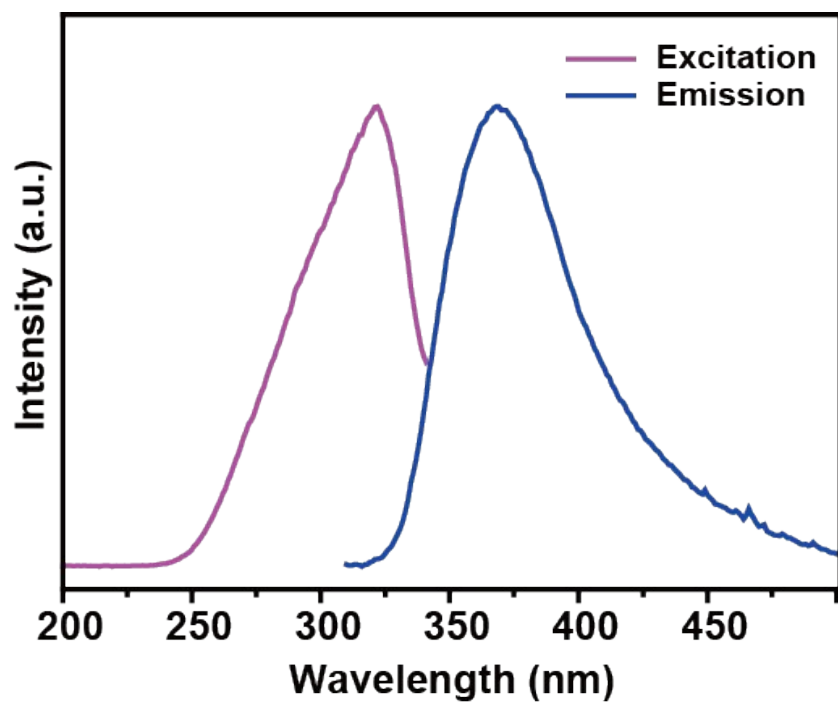

**Figure S12.** Excitation and emission spectra of the H<sub>4</sub>BPTC ligand.

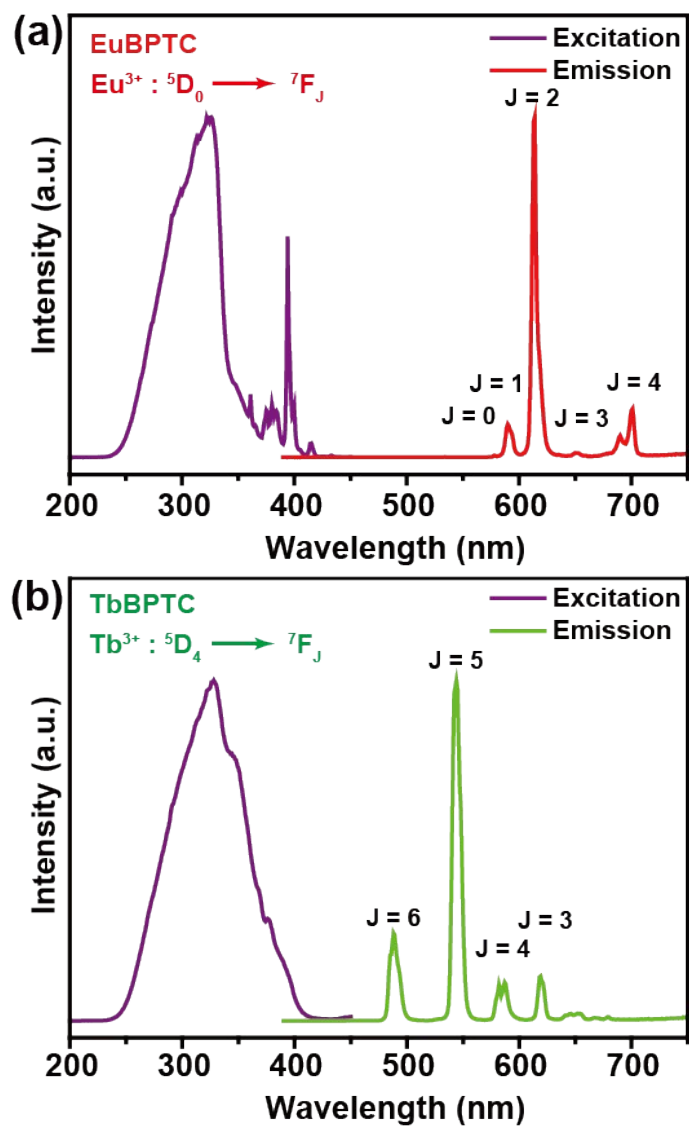

**Figure S13.** Excitation and emission spectra of the compound 1 (a) and compound 2 (b).

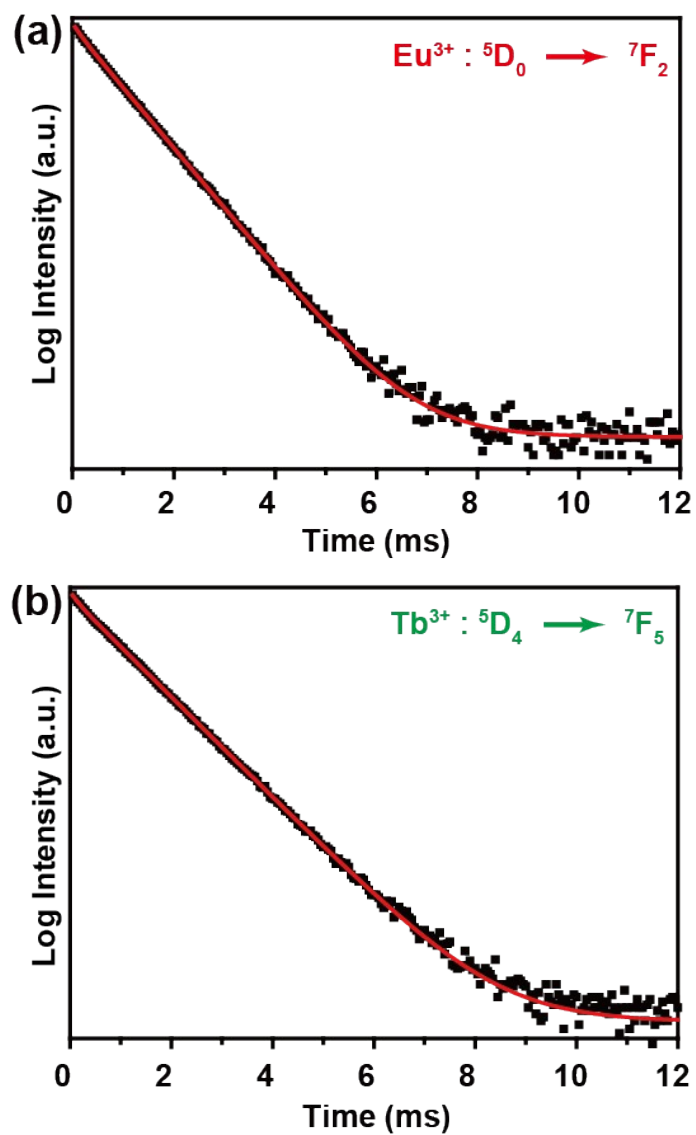

**Figure S14.** The decay curves of the compound **1** (a) monitored at 614 nm and compound **2** (b) monitored at 544 nm.

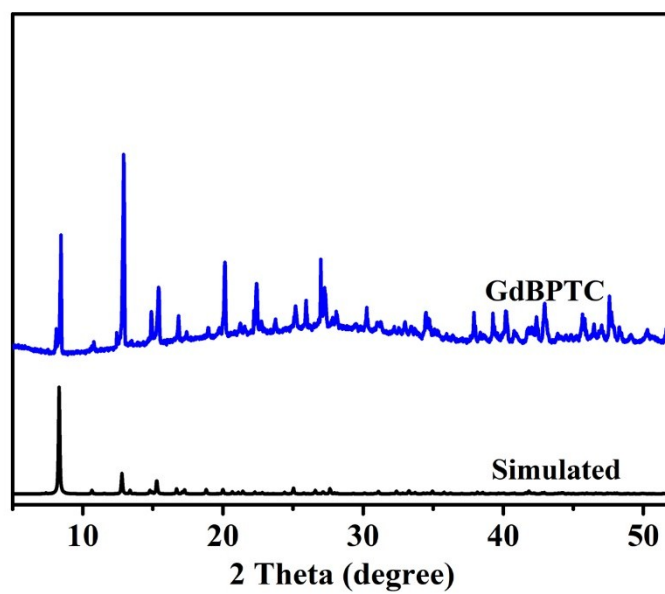

**Figure S15.** PXRD patters of GdBPTC and that simulated from EuBPTC.

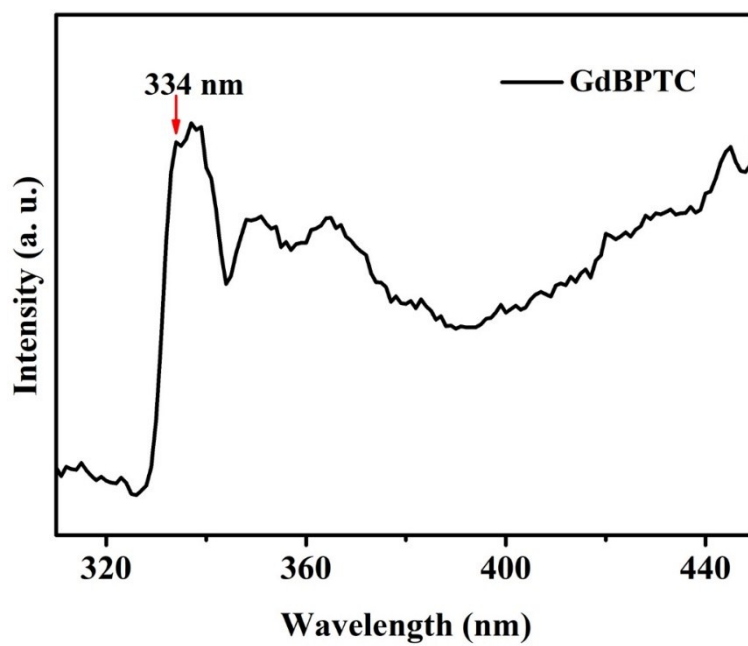

**Figure S16.** Emission spectrum of GdBPTC at 77 K.

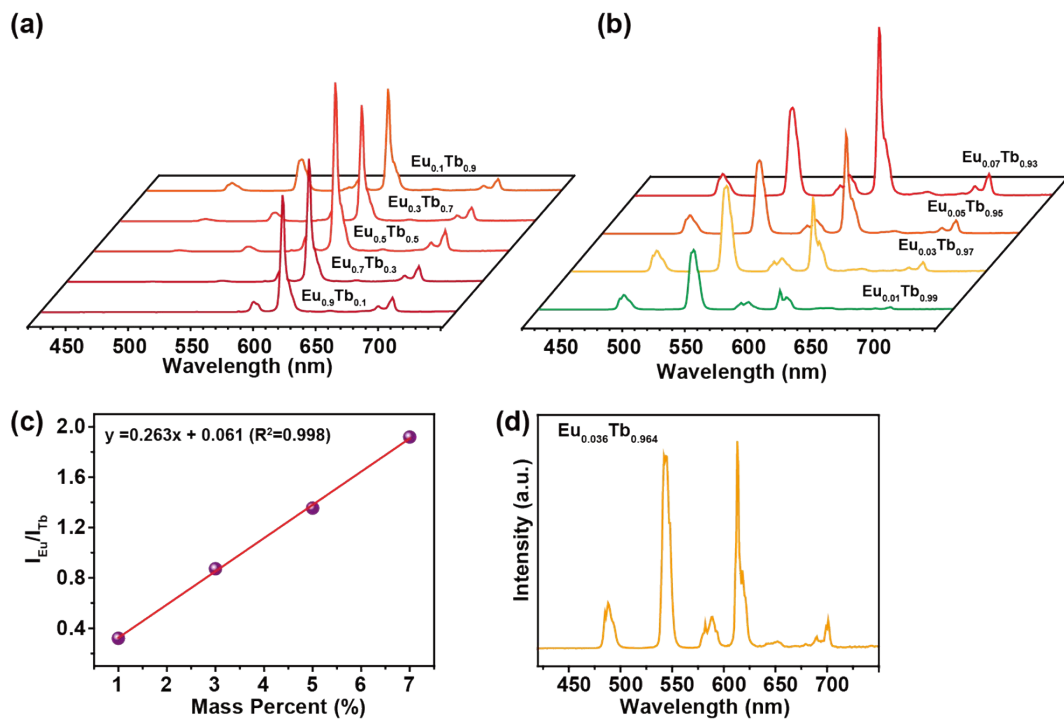

**Figure S17.** (a) (b) Emission spectra of different Eu<sup>3+</sup>/Tb<sup>3+</sup> molar in MOFs. (c) Relation between  $I_{Eu}/I_{Tb}$  and Eu content in MOFs. (d) Emission spectra of  $[(CH_3)_2NH_2]Eu_{0.036}Tb_{0.964}BPTC$  at room temperature.

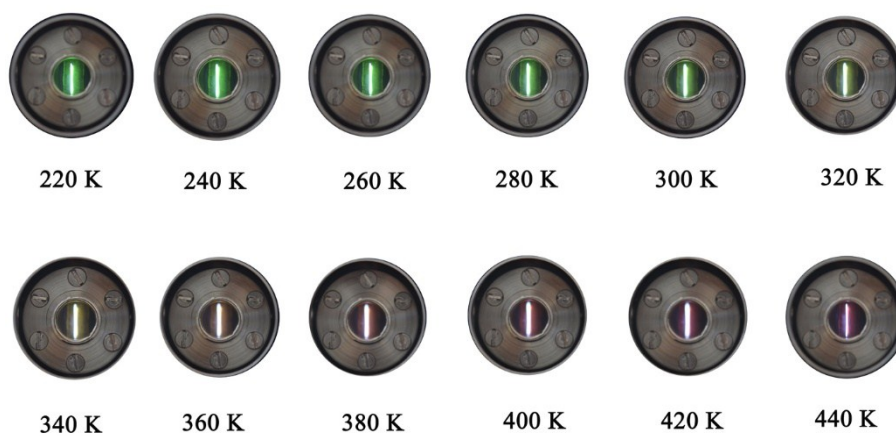

**Figure S18.** Temperature-dependent photographs of mixed Ln-MOF under UV excitation.

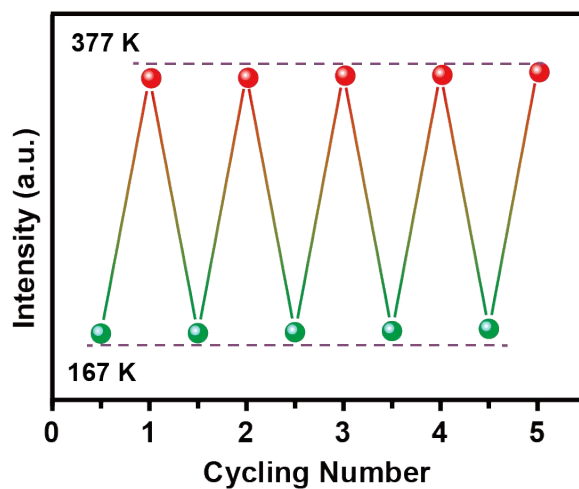

**Figure S19.** Reversible changes of emission intensity ratio of  $\text{Eu}^{3+}$  (545 nm) to  $\text{Tb}^{3+}$  (614 nm) of compound 3 by temperature cycling between 167 K and 377 K.

**Table S2** Overview of the relative sensitivity  $S_r$  for chosen recently reported Eu,Tb co-doped MOFs.

| Materials                                                                                            | Temp. range (K) | Max. $S_r$ (% $\text{K}^{-1}$ ) | Ref. |
|------------------------------------------------------------------------------------------------------|-----------------|---------------------------------|------|
| $\text{Tb}_{0.95}\text{Eu}_{0.05}(\text{btb})$                                                       | 10-320          | 2.85                            | 1    |
| $\text{Eu}_{0.0069}\text{Tb}_{0.9931}\text{DMBDC}$                                                   | 50-200          | 1.15                            | 2    |
| $\text{Tb}_{0.9}\text{Eu}_{0.1}\text{PIA}$                                                           | 100-300         | 3.27                            | 3    |
| $\text{Eu}_{0.19}\text{Tb}_{0.81}\text{PDDI}$                                                        | 313-473         | 0.37                            | 4    |
| $[\text{Eu}_{0.7}\text{Tb}_{0.3}(\text{D-cam})(\text{Himdc})_2(\text{H}_2\text{O})_2]_3$             | 100-450         | 0.11                            | 5    |
| $\text{Eu}_{0.37}\text{Tb}_{0.63}\text{-BTC-a}$                                                      | 313-473         | 0.17                            | 6    |
| $\text{Eu@UIO-66-Hybrid film}$                                                                       | 303-403         | 2.11                            | 7    |
| $\text{Tb}_{0.99}\text{Eu}_{0.01}(\text{BDC})_{1.5}(\text{H}_2\text{O})_2$                           | 290-320         | 0.31                            | 8    |
| $\text{Tb}_{0.957}\text{Eu}_{0.043}\text{cpda}$                                                      | 40-300          | 16                              | 9    |
| $(\text{Tb}_{0.914}\text{Eu}_{0.086})_2(\text{PDA})_3(\text{H}_2\text{O}) \cdot 2\text{H}_2\text{O}$ | 10-325          | 5.96                            | 10   |
| ZJU-88 $\Rightarrow$ perylene                                                                        | 293-353         | 1.28                            | 11   |
| $\text{Eu,TbPOM@MOF}$                                                                                | 60-360          | 0.71                            | 12   |
| $\text{Tb}_{0.80}\text{Eu}_{0.20}(\text{bpda})$                                                      | 303-328         | 1.39                            | 13   |



|                                                                             |         |      |           |
|-----------------------------------------------------------------------------|---------|------|-----------|
| $[\text{Tb}_{0.99}\text{Eu}_{0.01}(\text{hfa})_3(\text{dpbp})]_n$           | 200–300 | 0.52 | 14        |
| $[(\text{CH}_3)_2\text{NH}_2]\text{Eu}_{0.036}\text{Tb}_{0.964}\text{BPTC}$ | 220-310 | 9.42 | This work |

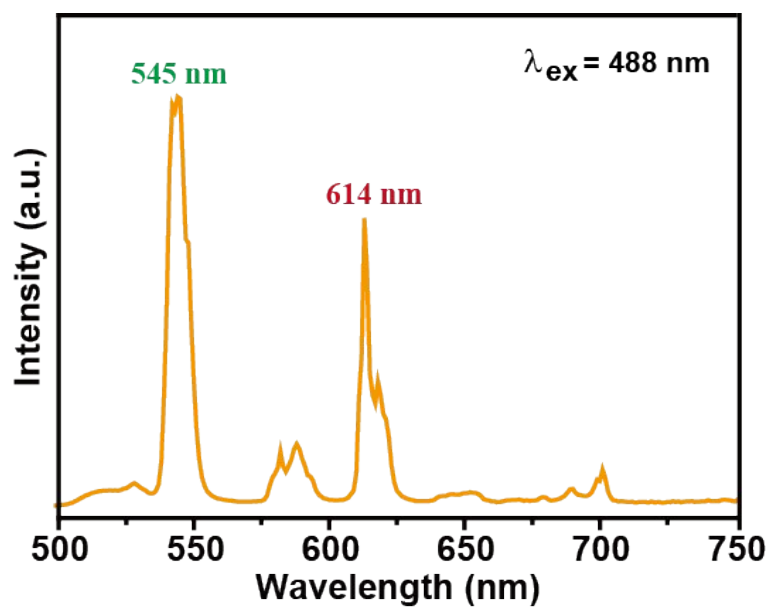

**Figure S20.** Room temperature emission spectra of  $[(\text{CH}_3)_2\text{NH}_2]\text{Eu}_{0.036}\text{Tb}_{0.964}\text{BPTC}$  excited at 488 nm.

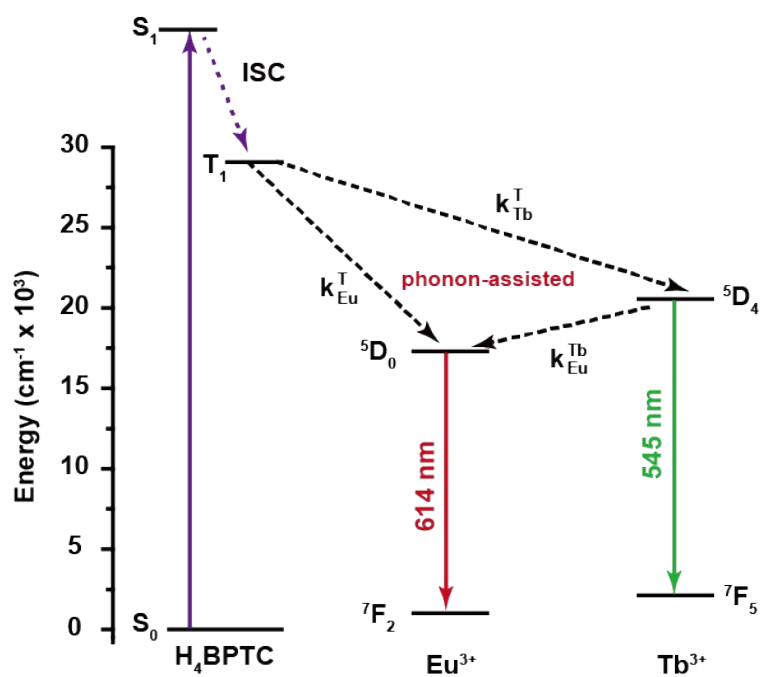

**Figure S21.** Schematic illustration of luminescence generation in MOFs. Abbreviations: S = singlet; T = triplet; ISC = intersystem crossing; k = nonradiative and radiative transition probability. The solid arrows represent absorption and radiative transitions; dotted arrows indicate nonradiative transitions.

1. D. Ananias, C. D. S. Brites, L. D. Carlos, J. Rocha, *Eur. J. Inorg. Chem.*, 2016, 1967.
2. Y. J. Cui, H. Xu, Y. F. Yue, Z. Y. Guo, J. C. Yu, Z. X. Chen, J. K. Gao, Y. Yang, G. D. Qian and B. L. Chen, *J. Am. Chem. Soc.*, 2012, 134, 3979.
3. X. Rao, T. Song, J. Gao, Y. Cui, Y. Yang, C. Wu, B. Chen and G. Qian, *J. Am. Chem. Soc.*, 2013, 135, 15559.
4. D. Zhao, H. Wang, G. Qian, *CrystEngComm*, 2018, 20, 7395.
5. Y. H. Han, C. B. Tian, Q. H. Li and S. W. Du, *J. Mater. Chem. C*, 2014, 2, 8065.
6. H. Wang, D. Zhao, Y. Cui, Y. Yang and G. Qian, *J. Solid State Chem.*, 2017, 246, 341.
7. J. Feng, S. Gao, T. Liu, J. Shi, and R. Cao, *ACS Appl. Mater. Interfaces*, 2018, 10, 6014.
8. A. Cadiau, C. D. S. Brites, P. M. F. J. Costa, R. A. S. Ferreira, J. Rocha and L. D. Carlos, *ACS Nano*, 2013, 7, 7213.
9. Y. J. Cui, W. F. Zou, R. J. Song, J. C. Yu, W. Q. Zhang, Y. Yang and G. D. Qian, *Chem. Commun.*, 2014, 50, 719.
10. Z. Wang, D. Ananias, A. Carne-Sanchez, C. D. S. Brites, I. Imaz, D. MasPOCH, J. Rocha and L. D. Carlos, *Adv. Funct. Mater.*, 2015, 25, 2824.
11. Y. J. Cui, R. J. Song, J. C. Yu, M. Liu., Z. Q. Wang, C. D. Wu, Y. Yang, Z. Y. Wang, B. L. Chen and G. D. Qian, *Adv. Mater.*, 2015, 27, 1420.
12. A. M. Kaczmarek, *J. Mater. Chem. C*, 2018, 6, 5916.
13. D. Zhao, X. Rao, J. Yu, Y. Cui, Y. Yang and G. Qian, *Inorg. Chem.*, 2015, 54, 11193.
14. K. Miyata, Y. Konno, T. Nakanishi, A. Kobayashi, M. Kato, K. Fushimi and Y. Hasegawa, *Angew. Chem., Int. Ed.*, 2013, 52, 6413.
